# Supplementary material for: RETRACTED: The Small Molecule Ephrin Receptor Inhibitor, GLPG1790, Reduces Renewal Capabilities of Cancer Stem Cells, Showing Anti-Tumour Efficacy on Preclinical Glioblastoma Models
Source: PubMed Central journal article supplement (PMC6468443; doi:10.3390/cancers11030359), 2019-03-13
Supplement: cancers-11-00359-s001.pdf [file cancers-11-00359-s001.pdf]

# Supplementary Materials: The Small Molecule Ephrin Receptor Inhibitor, GLPG1790, Reduces Renewal Capabilities of Cancer Stem Cells, Showing Anti-Tumour Efficacy on Preclinical Glioblastoma Models

Giovanni Luca Gravina, Andrea Mancini, Alessandro Colapietro, Simona Delle Monache, Roberta Sferra, Flora Vitale, Loredana Cristiano, Stefano Martellucci, Francesco Marampon, Vincenzo Mattei, Filip Berinckx, Philippe Pujuguet, Laurent Saniere, Giocondo Lorenzon, Ellen Van Der Aar and Claudio Festuccia

**Table S1.** Hazard ratios for the single therapies (subcutaneous xenografts).

| Comparison          | U87MG             |            |                   | U251              |            |                   | T98G              |            |                   |
|---------------------|-------------------|------------|-------------------|-------------------|------------|-------------------|-------------------|------------|-------------------|
|                     | Hazard Ratio (HR) | CI95%      | Significance      | Hazard Ratio (HR) | CI95%      | Significance      | Hazard Ratio (HR) | CI95%      | Significance      |
| CTRL vs. GLPG1790   | 4.38              | 0.87–22.15 | $p < 0.0001$      | 3.55              | 1.23–10.21 | $p = 0.0004$      | 4.18              | 1.38–12.69 | $p < 0.0001$      |
| CTRL vs. RT         | 2.86              | 0.65–15.63 | $p = 0.0012$      | 1.58              | 0.60–3.61  | $p = 0.3060$ (NS) | 2.94              | 0.99–8.73  | $p = 0.0008$      |
| CTRL vs. TMZ        | 4.67              | 1.35–12.59 | $p < 0.0001$      | 5.73              | 1.49–15.02 | $p < 0.0001$      | 2.12              | 0.83–5.42  | $p = 0.0334$      |
| CTRL vs. RT+TMZ     | 8.88              | 3.07–32.77 | $p < 0.0001$      | 5.53              | 1.71–17.95 | $p < 0.0001$      | 5.55              | 1.51–20.11 | $p < 0.0001$      |
| RT vs. GLPG1790     | 1.82              | 0.73–4.55  | $p = 0.0962$ (NS) | 2.87              | 1.06–7.82  | $p = 0.0041$      | 2.23              | 1.14–4.36  | $p = 0.0115$      |
| RT vs. TMZ          | 4.46              | 1.44–13.85 | $p < 0.0001$      | 4.77              | 1.50–15.17 | $p < 0.0001$      | 1.04              | 0.43–2.50  | $p = 0.9132$ (NS) |
| RT vs. RT+TMZ       | 5.20              | 1.64–16.53 | $p < 0.0001$      | 5.57              | 1.71–18.14 | $p < 0.0001$      | 3.68              | 1.73–7.85  | $p < 0.0001$      |
| GLPG1790 vs. TMZ    | 2.10              | 0.82–5.37  | $p = 0.0427$      | 2.88              | 1.04–7.99  | $p = 0.0027$      | 1.49              | 0.76–2.69  | $p = 0.2561$ (NS) |
| GLPG1790 vs. RT+TMZ | 3.81              | 1.31–11.09 | $p = 0.0014$      | 5.12              | 1.62–16.17 | $p < 0.0001$      | 2.37              | 1.20–4.68  | $p = 0.0011$      |
| TMZ vs. RT+TMZ      | 2.42              | 0.88–5.84  | $p = 0.0407$      | 1.97              | 0.75–5.15  | $p = 0.0983$ (NS) | 2.69              | 1.341–5.41 | $p = 0.0007$      |

**Table S2.** GLPG1790 reduced vasculogenesis.

| Treatment | Angiogenic Vessels Counts/100× Microscopic Field |                    |              |                        |              |                                   |
|-----------|--------------------------------------------------|--------------------|--------------|------------------------|--------------|-----------------------------------|
|           | U87MG                                            |                    | U251         |                        | T98G         |                                   |
|           | Mean ± SD                                        | Statistics         | Mean ± SD    | Statistics vs. Vehicle | Mean ± SD    | Statistics                        |
| Vehicle   | 25.12 ± 4.09                                     |                    | 20.75 ± 2.87 |                        | 18.87 ± 5.03 |                                   |
| GLPG1790  | 7.38 ± 2.72                                      | $p < 0.0001$ *     | 6.12 ± 1.81  | $p < 0.0001$ *         | 5.12 ± 1.55  | $p < 0.0001$ *                    |
| RT        | 5.0 ± 1.93                                       | $p = 0.636$ NS **  | 6.00 ± 1.20  | $p = 0.8727$ NS **     | 7.75 ± 1.98  | $p < 0.0001$ *<br>$p = 0.0106$ ** |
| TMZ       | 9.62 ± 2.13                                      | $p = 0.0871$ NS ** | 8.37 ± 1.06  | $p = 0.0137$ **        | 11.0 ± 3.38  | $p < 0.0001$ *<br>$p = 0.0005$ ** |

| RT+TMZ                                               | 3.37 ± 1.30 | $p = 0.0022^{**}$                                | 3.87 ± 1.36  | $p = 0.0137$                                     | 5.87 ± 2.59  | $p < 0.001^{*}$<br>$p = 0.04936 \text{ NS}^{**}$ |
|------------------------------------------------------|-------------|--------------------------------------------------|--------------|--------------------------------------------------|--------------|--------------------------------------------------|
| Vasculomimetic Vessels Counts/100× Microscopic Field |             |                                                  |              |                                                  |              |                                                  |
| Vehicle                                              | 16.45 ± 4.2 |                                                  | 10.32 ± 2.87 |                                                  | 12.25 ± 2.96 |                                                  |
| GLPG1790                                             | 7.25 ± 1.5  | $p < 0.0001^{*}$                                 | 4.45 ± 1.37  | $p < 0.0001^{*}$                                 | 3.37 ± 3.24  | $p < 0.0001^{*}$                                 |
| RT                                                   | 24.30 ± 6.2 | $p < 0.001^{*}$<br>$p = 0.0136^{**}$             | 14.36 ± 4.40 | $p = 0.2332 \text{ NS}^{*}$<br>$p < 0.0001^{**}$ | 15.87 ± 4.94 | $p < 0.0001 \text{ NS}^{**}$                     |
| TMZ                                                  | 5.50 ± 2.3  | $p < 0.0001^{*}$<br>$p = 0.6446 \text{ NS}^{**}$ | 5.44 ± 1.54  | $p = 0.2137 \text{ NS}^{**}$                     | 12.0 ± 4.63  | $p < 0.0001^{**}$                                |
| RT+TMZ                                               | 3.75 ± 3.2  | $p < 0.0001^{*}$<br>$p = 0.1022 \text{ NS}^{**}$ | 3.87 ± 1.36  | $p = 0.0137$                                     | 1.87 ± 1.88  | $p = 0.2776 \text{ NS}^{**}$                     |

\* vs. Vehicle, \*\* vs. GLPG1790.

**Table S3.** GLPG1790 reduced hypoxic areas.

| Treatment                          | Necrosis (Arbitrary Score) |                             |             |                        |             |                   |
|------------------------------------|----------------------------|-----------------------------|-------------|------------------------|-------------|-------------------|
|                                    | U87MG                      |                             | U251        |                        | T98G        |                   |
|                                    | Mean ± SD                  | Statistics                  | Mean ± SD   | Statistics vs. Vehicle | Mean ± SD   | Statistics        |
| Vehicle                            | 1.0 ± 0.63                 |                             | 1.67 ± 0.82 |                        | 1.17 ± 0.75 |                   |
| GLPG1790                           | 0.33 ± 0.52                | $p = 0.0734 \text{ NS}^{*}$ | 0.55 ± 0.81 | $p = 0.0346^{*}$       | 0.35 ± 0.45 | $p = 0.0490^{*}$  |
| RT                                 | 1.67 ± 0.82                | $p = 0.0070^{**}$           | 2.0 ± 0.75  | $p = 0.0114^{**}$      | 1.33 ± 0.90 | $p = 0.4890^{**}$ |
| TMZ                                | 2.0 ± 0.63                 | $p = 0.0005$                | 2.35 ± 0.82 | $p = 0.0033^{**}$      | 1.33 ± 0.70 | $p = 0.0290^{**}$ |
| RT+TMZ                             | 2.33 ± 0.52                | $p < 0.0001$                | 2.55 ± 0.55 | $p = 0.0006^{**}$      | 2.17 ± 0.75 | $p = 0.0006^{**}$ |
| HIF2 Immunostain (Arbitrary Score) |                            |                             |             |                        |             |                   |
| Vehicle                            | 1.50 ± 0.76                |                             | 1.57 ± 0.79 |                        | 2.00 ± 0.82 |                   |
| GLPG1790                           | 0.50 ± 0.53                | $p = 0.0086^{*}$            | 0.57 ± 0.79 | $p = 0.0013^{*}$       | 1.14 ± 0.39 | $p = 0.0408^{*}$  |
| RT                                 | 2.285 ± 0.71               | $p = 0.0004^{**}$           | 2.28 ± 0.76 | $p = 0.0349^{**}$      | 2.43 ± 0.79 | $p = 0.0060^{**}$ |
| TMZ                                | 1.88 ± 0.83                | $p = 0.0022^{**}$           | 2.14 ± 0.90 | $p = 0.0046^{**}$      | 2.14 ± 0.69 | $p = 0.0152^{**}$ |
| RT+TMZ                             | 2.37 ± 0.52                | $p = 0.0001$                | 2.64 ± 0.37 | $p = 0.0014$           | 2.71 ± 0.49 | $p = 0.0005$      |

\* vs. Vehicle, \*\* vs. GLPG1790.

**Table S4.** GLPG1790 reduced leucocytes infiltration.

| Treatment                                      | Granulocytes Infiltration (Arbitrary Score) |                   |             |                              |             |                             |
|------------------------------------------------|---------------------------------------------|-------------------|-------------|------------------------------|-------------|-----------------------------|
|                                                | U87MG                                       |                   | U251        |                              | T98G        |                             |
|                                                | Mean ± SD                                   | Statistics        | Mean ± SD   | Statistics vs. Vehicle       | Mean ± SD   | Statistics                  |
| Vehicle                                        | 4.60 ± 1.11                                 |                   | 5.25 ± 1.39 |                              | 3.87 ± 0.99 |                             |
| GLPG1790                                       | 1.05 ± 0.73                                 | $p = 0.0082^{*}$  | 2.00 ± 1.31 | $p = 0.0003^{*}$             | 1.50 ± 1.33 | $p = 0.0011^{*}$            |
| RT                                             | 7.24 ± 1.33                                 | $p < 0.0001^{**}$ | 6.87 ± 1.25 | $p < 0.0001^{**}$            | 6.00 ± 1.51 | $p < 0.0001^{**}$           |
| TMZ                                            | 8.15 ± 1.00                                 | $p < 0.0001^{**}$ | 7.50 ± 1.20 | $p < 0.0001^{**}$            | 4.75 ± 1.67 | $p = 0.0007^{**}$           |
| RT+TMZ                                         | 8.62 ± 0.55                                 | $p < 0.0001^{**}$ | 8.00 ± 1.20 | $p < 0.0001^{**}$            | 7.62 ± 0.92 | $p < 0.0001^{**}$           |
| Lymphomonocytes Infiltration (Arbitrary Score) |                                             |                   |             |                              |             |                             |
| Vehicle                                        | 5.60 ± 1.10                                 |                   | 4.00 ± 1.20 |                              | 3.25 ± 2.19 |                             |
| GLPG1790                                       | 1.00 ± 0.55                                 | $p = 0.0001^{*}$  | 1.88 ± 1.46 | $p = 0.0066^{*}$             | 1.25 ± 1.58 | $p = 0.0548 \text{ NS}^{*}$ |
| RT                                             | 7.20 ± 1.11                                 | $p < 0.0001^{**}$ | 5.25 ± 1.83 | $p = 0.0011^{**}$            | 4.13 ± 2.53 | $p = 0.0165^{**}$           |
| TMZ                                            | 7.85 ± 1.30                                 | $p < 0.0001^{**}$ | 3.50 ± 1.93 | $p = 0.0779 \text{ NS}^{**}$ | 3.38 ± 2.26 | $p < 0.0471^{**}$           |

RT+TMZ      8.35 ± 0.80       $p < 0.0001$  \*\*      7.13 ± 1.13       $p < 0.0001$  \*\*      6.75 ± 0.71       $p < 0.0001$  \*\*

\* vs. Vehicle, \*\* vs. GLPG1790.

**Table S5.** Hazard ratios for the single therapies (U87MG orthotopic model).

| Comparison          | DFS               |            |                   | OS                |            |                   |
|---------------------|-------------------|------------|-------------------|-------------------|------------|-------------------|
|                     | Hazard Ratio (HR) | CI95%      | Significance      | Hazard Ratio (HR) | CI95%      | Significance      |
| CTRL vs. GLPG1790   | 2.85              | 1.05–7.74  | $p = 0.0022$      | 3.15              | 1.13–8.76  | $p = 0.0010$      |
| CTRL vs. RT         | 1.67              | 0.68–4.14  | $p = 0.1379$ (NS) | 2.44              | 0.93–6.41  | $p = 0.0147$      |
| CTRL vs. TMZ        | 3.38              | 1.19–9.60  | $p = 0.0003$      | 3.65              | 1.26–10.59 | $p = 0.0001$      |
| CTRL vs. RT+TMZ     | 5.22              | 1.64–16.59 | $p < 0.0001$      | 5.35              | 1.67–17.18 | $p < 0.0001$      |
| RT vs. GLPG1790     | 1.81              | 0.73–4.53  | $p = 0.1002$ (NS) | 1.87              | 0.75–4.60  | $p = 0.0883$ (NS) |
| RT vs. TMZ          | 2.11              | 0.83–5.39  | $p = 0.0321$      | 2.78              | 1.03–7.49  | $p = 0.0036$      |
| RT vs. RT+TMZ       | 4.03              | 1.37–11.90 | $p = 0.0001$      | 5.06              | 1.61–15.94 | $p < 0.0001$      |
| GLPG1790 vs. TMZ    | 1.52              | 0.62–3.73  | $p = 0.2631$ (NS) | 1.85              | 0.74–4.64  | $p = 0.1128$ (NS) |
| GLPG1790 vs. RT+TMZ | 3.79              | 1.31–11.01 | $p = 0.0008$      | 4.22              | 1.41–12.60 | $p = 0.0003$      |
| TMZ vs. RT+TMZ      | 3.42              | 1.21–9.71  | $p = 0.0022$      | 3.39              | 1.20–9.61  | $p = 0.0020$      |

**Table S6.** Hazard ratios for the single therapies (CSCs5 cell orthotopic model).

| Comparison          | DFS               |            |                   | OS                |            |                   |
|---------------------|-------------------|------------|-------------------|-------------------|------------|-------------------|
|                     | Hazard Ratio (HR) | CI95%      | Significance      | Hazard Ratio (HR) | CI95%      | Significance      |
| CTRL vs. GLPG1790   | 2.46              | 0.93–6.45  | $p = 0.0060$      | 4.15              | 1.37–12.55 | $p < 0.0001$      |
| CTRL vs. RT         | 1.15              | 0.48–2.77  | $p = 0.6491$ (NS) | 2.00              | 0.79–5.09  | $p = 0.0733$ (NS) |
| CTRL vs. TMZ        | 3.11              | 1.12–8.64  | $p = 0.0004$      | 4.30              | 1.40–13.17 | $p < 0.0001$      |
| CTRL vs. RT+TMZ     | 4.20              | 1.40–12.60 | $p < 0.0001$      | 5.25              | 1.63–16.95 | $p < 0.0001$      |
| RT vs. GLPG1790     | 2.44              | 0.89–6.88  | $p = 0.0192$      | 3.04              | 1.10–8.40  | $p = 0.0027$      |
| RT vs. TMZ          | 3.40              | 1.20–9.65  | $p = 0.0006$      | 3.83              | 1.30–11.29 | $p = 0.0002$      |
| RT vs. RT+TMZ       | 4.61              | 1.49–14.26 | $p < 0.0001$      | 5.27              | 1.63–17.04 | $p < 0.0001$      |
| GLPG1790 vs. TMZ    | 1.75              | 0.70–4.34  | $p = 0.1421$ (NS) | 1.40              | 0.58–3.42  | $p = 0.4006$ (NS) |
| GLPG1790 vs. RT+TMZ | 3.62              | 1.26–10.42 | $p = 0.0008$      | 4.11              | 1.38–12.28 | $p = 0.0002$      |
| TMZ vs. RT+TMZ      | 3.14              | 1.27–8.73  | $p = 0.0030$      | 3.89              | 1.33–11.43 | $p = 0.0005$      |

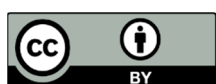

© 2019 by the authors. Licensee MDPI, Basel, Switzerland. This article is an open access article distributed under the terms and conditions of the Creative Commons Attribution (CC BY) license (<http://creativecommons.org/licenses/by/4.0/>).
